# Supplementary material for: 9.63% efficient flexible Cu2ZnSn(S,Se)4 solar cells fabricated via scalable doctor-blading under ambient conditions
Source: Royal Society of Chemistry journal article supplement (doi:10.1039/d1ta07073h), 2021-01-01
Supplement: d1ta07073h1.pdf [file d1ta07073h1.pdf]

**9.63% efficient flexible  $\text{Cu}_2\text{ZnSn}(\text{S},\text{Se})_4$  solar cells via scalable doctor-blading in ambient condition**

*Han Xu<sup>1,2</sup>, Sijie Ge<sup>1,2</sup>, Wentao Yang<sup>1,2</sup>, Saqib Nawaz Khan<sup>1,2</sup>, Yuxiang Huang<sup>1,2</sup>, Yaohua Mai<sup>3</sup>, Ening Gu<sup>1,2\*</sup>, Xianzhong Lin<sup>1,2\*</sup>, and Guowei Yang<sup>1</sup>*

<sup>1</sup> Guangzhou Key Laboratory of Flexible Electronic Materials and Wearable Devices, State Key Laboratory of Optoelectronic Materials and Technologies, School of Materials Science and Engineering, Sun Yat-Sen University, Guangzhou, 510275, China

<sup>2</sup> Key Laboratory of Polymeric Composite and Functional Materials of Ministry of Education, Sun Yat-Sen University, Guangzhou, 510275, China

<sup>3</sup> Institute of New Energy Technology, College of Information and Technology, Jinan University, Guangzhou, 510632, China

\*Correspondence: [guen@mail.sysu.edu.cn](mailto:guen@mail.sysu.edu.cn), [linxzh8@mail.sysu.edu.cn](mailto:linxzh8@mail.sysu.edu.cn)

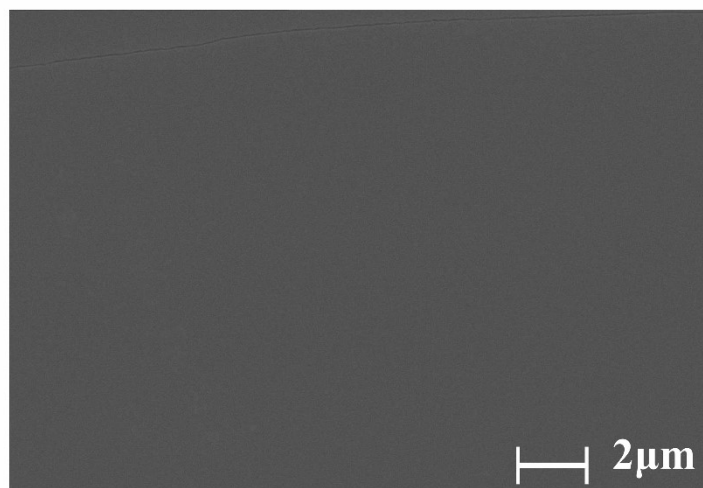

**Figure S1.** The top-view SEM micrograph of the Na-0 CZTS precursor film.

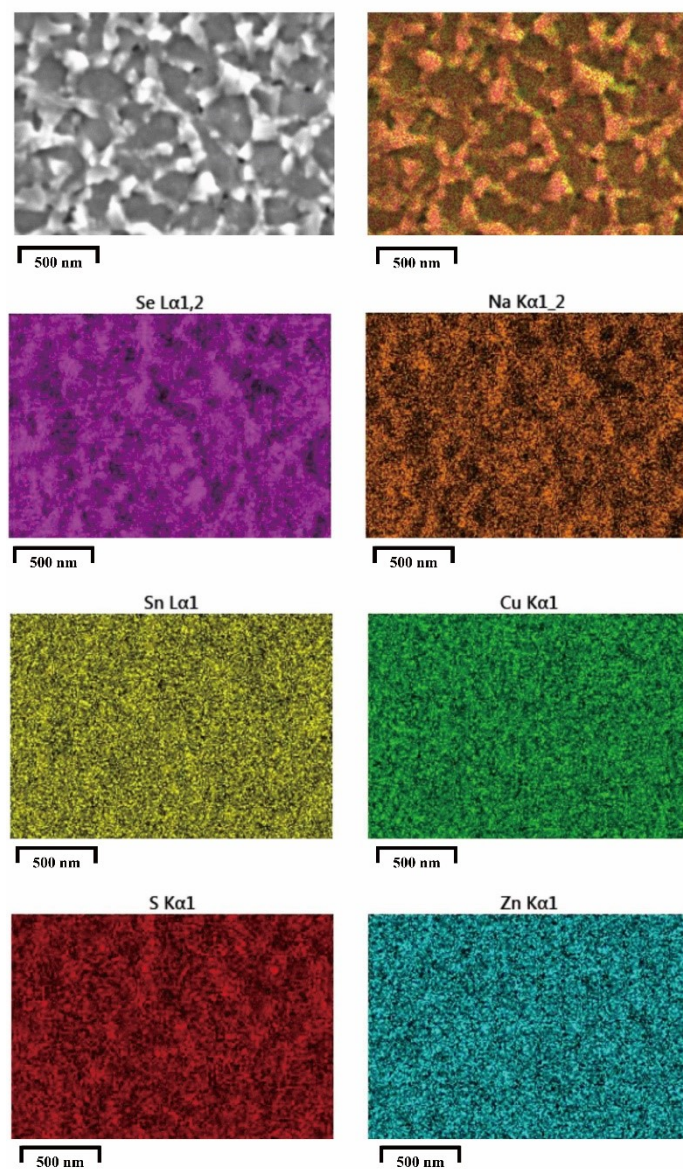

**Figure S2.** The EDX elemental mapping of the Na-all sample.

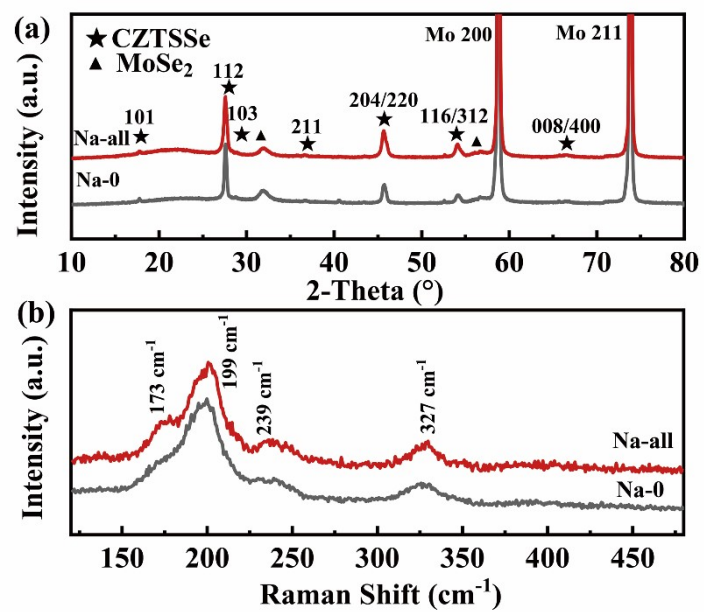

**Figure S3.** (a) XRD patterns and (b) Raman spectra of Na-0 and Na-all CZTSSe thin films on the Mo foil.

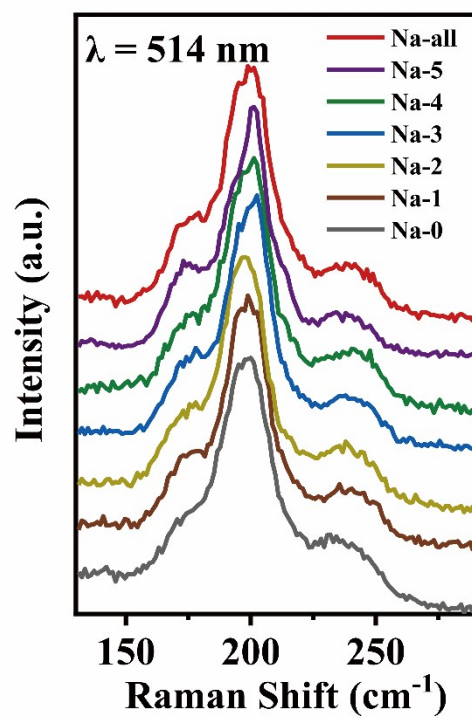

**Figure S4.** Raman spectra of Na-0 ~ Na-all at 130 ~ 290  $\text{cm}^{-1}$ , measured with an excitation wavelength of 514 nm.

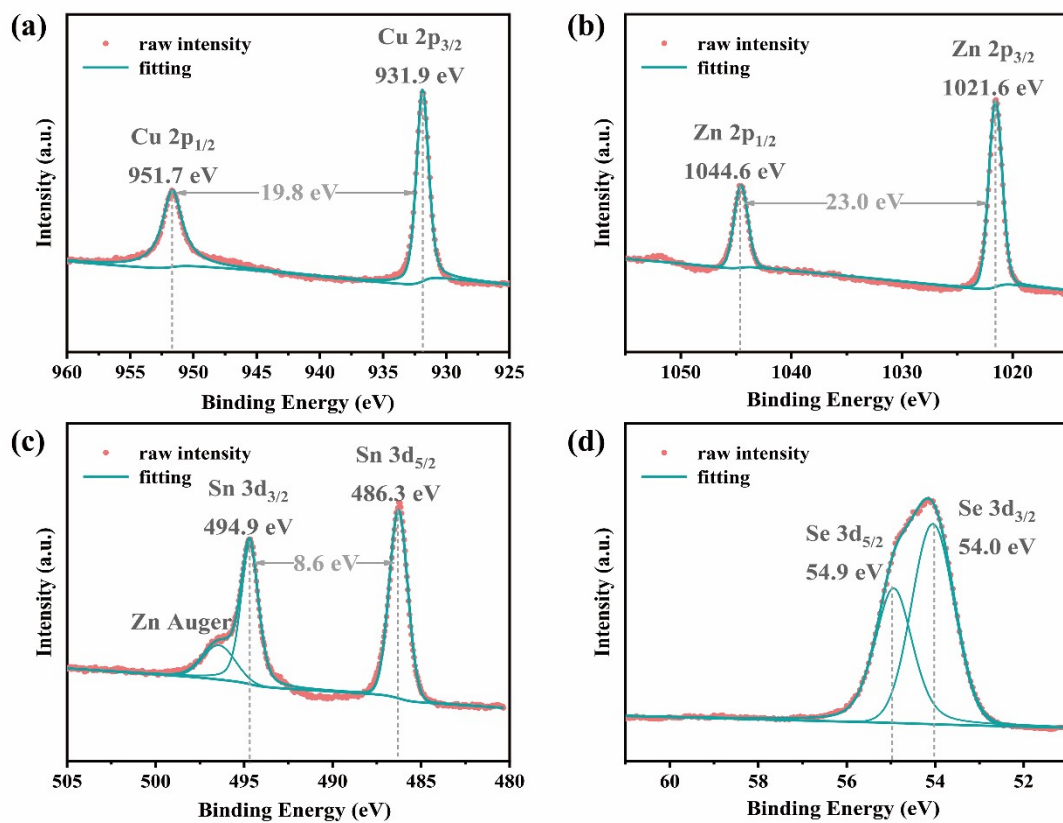

**Figure S5.** XPS spectra of (a) Cu 2p, (b) Zn 2p, (c) Sn 3d, and (d) Se 3d in the Na-4CZTSSe.

**Table S1.** FWHM of the (112) plane and the corresponding crystallite size estimated from the Scherrer equation for Na-0 ~ Na-5 samples.

| Sample | FWHM  | Size (nm) |
|--------|-------|-----------|
| Na-0   | 0.310 | 26.12     |
| Na-1   | 0.283 | 28.60     |
| Na-2   | 0.295 | 27.43     |
| Na-3   | 0.288 | 28.11     |
| Na-4   | 0.242 | 33.44     |
| Na-5   | 0.297 | 27.24     |

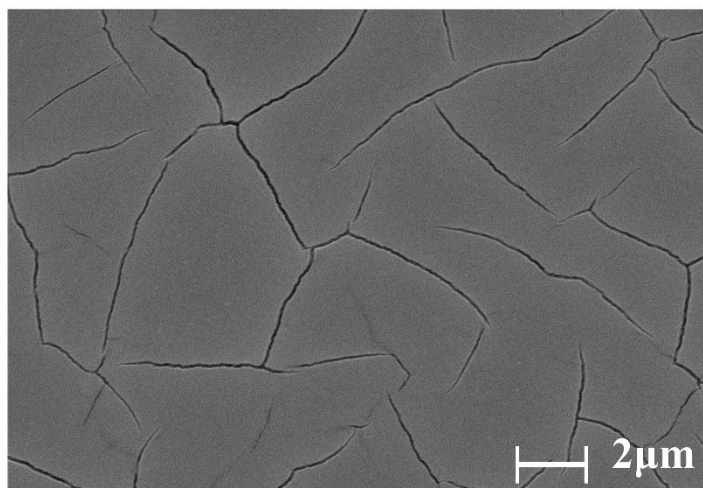

**Figure S6.** The top-view SEM micrograph of the Na-5 CZTS precursor film.



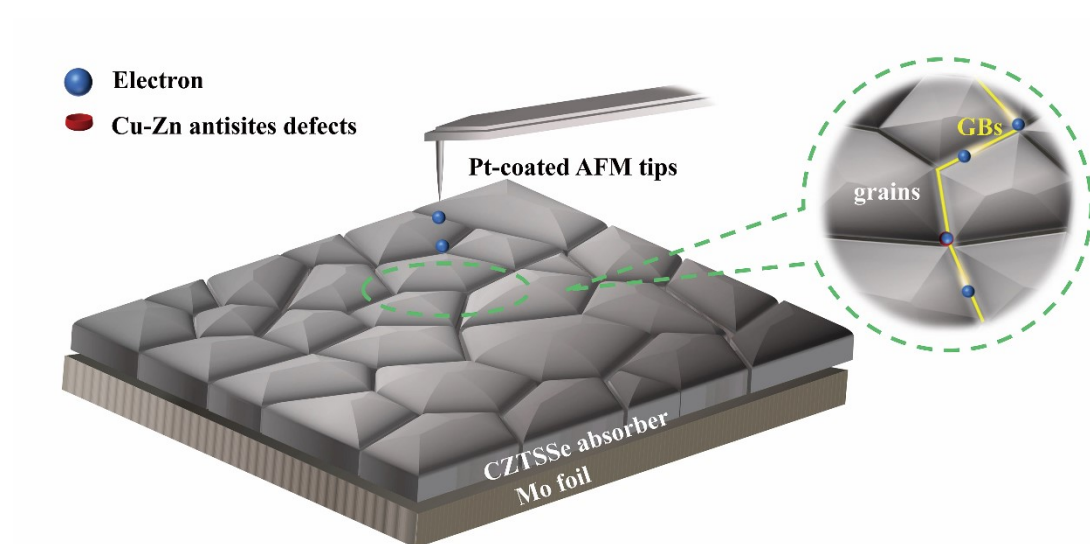

**Figure S7** A schematic figure shows that the injected electrons from AFM tip transport along GBs, and the enlarged view illustrates that the Cu-Zn antisites defects at GBs reduce the mobility of electrons by trapping them, which leads to a lower current.
